# Supplementary material
Source: PubMed Central journal article supplement (PMC4201983)
Supplement: NIHMS624751-supplement-1.pdf [file NIHMS624751-supplement-1.pdf]

# Supplement Figure 1

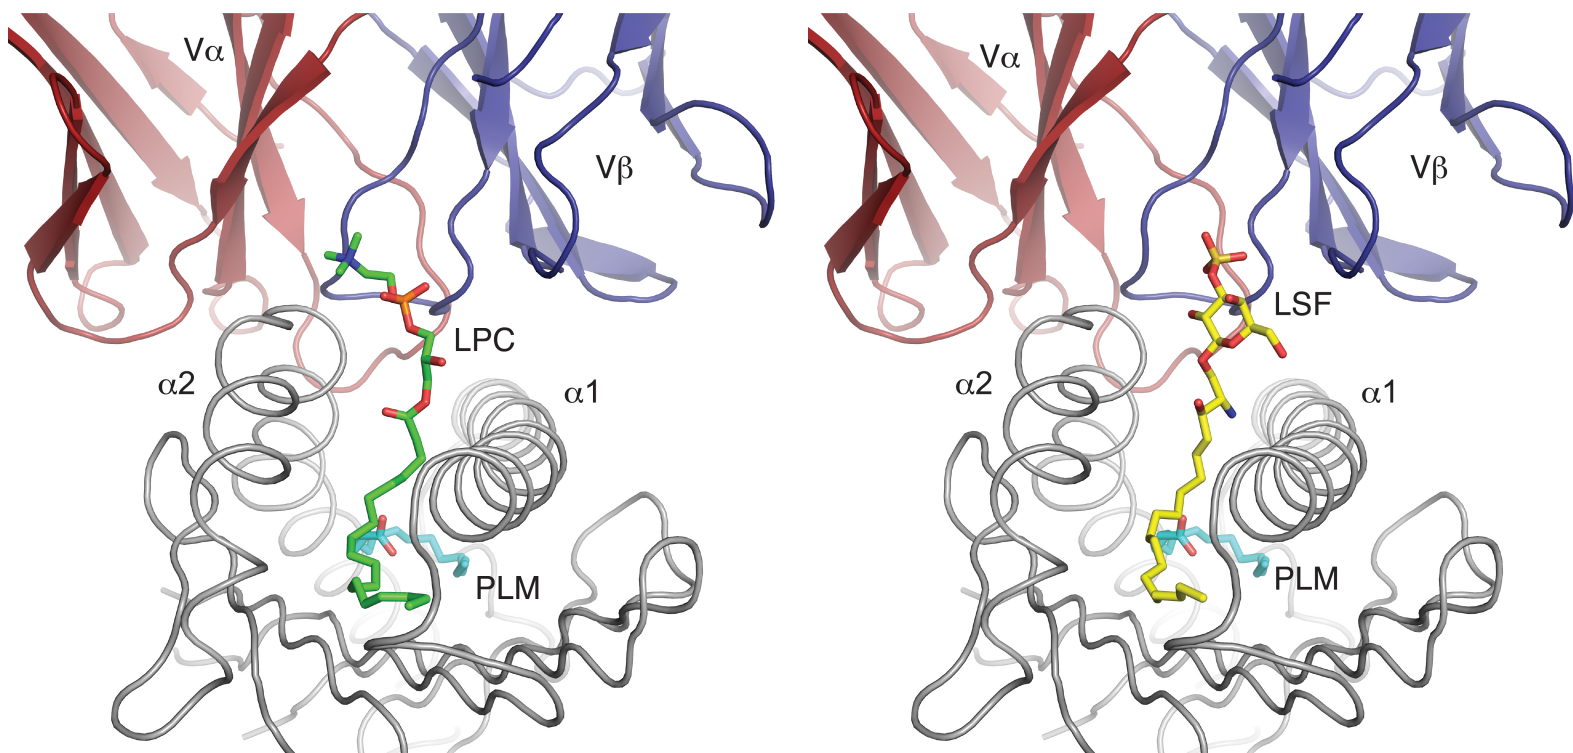

## Supplement Figure 1. Modeling of LPC-bound CD1d to a type II NKT TCR

Molecular models of the binding of mCD1d-LPC C:18-Hy19.3 TCR (left) and structure of mCD1d-LSF-Hy19.3 TCR (right, PDB ID 4ELM) is shown.
